# Supplementary material for: GRP75-mediated ER-mitochondria coupling Promotes RPE Ferroptosis via GPX4 degradation in Age-related Macular Degeneration
Source: Research Square preprint supplement (doi:10.21203/rs.3.rs-7621125/v1), 2025-10-06
Supplement: Supplementary file 1 [file 07a23900af126beb983f290c.docx]

**Supplementary Table 1 Main materials and reagents**

| **Reagents** | **Source** | **Identifier** |
| --- | --- | --- |
| Sodium iodate | Sigma | S4007 |
| Erastin | MCE | HY-15763 |
| RSL3 | MCE | HY-100218A |
| Chloroquine | MCE | [HY-](https://www.medchemexpress.cn/Necrostatin-1.html)17589A |
| CsA | MCE | HY-B0579 |
| BAPTA-AM | MCE | HY-100545 |
| Ferrostatin-1 | MCE | HY-100579 |
| H-151 | MCE | HY-112693 |
| XRK3F2 | MCE | HY-112904 |
| BX795 | MCE | HY-10514 |
| Protein A/G Magnetic Beads | MCE | HY-K0202 |
| MG132 | Selleck | S2619 |
| Cycloheximide | Selleck | S7418 |
| Cell counting kit-8 | Beyotime | C0043 |
| RIPA lysis buffer  BCA protein assay kit | Beyotime  Beyotime | P0013B  P0010 |
| JC1 assay kit  MPTP assay kit | Beyotime  Beyotime | C2006  C2009S |
| Mito-Tracker Red  MitoSOX™ Red  ER-Tracker™ Green  Rhod-2-AM | Beyotime  Thermo Fisher  Thermo Fisher  Thermo Fisher | C1035  M36008  E34251  R1245MP |
| C11-BODIPY (581/591) | Thermo Fisher | D3861 |
| Lipofectamine 3000  Pierce™ IP lysis buffer | Thermo Fisher  Thermo Fisher | L3000015  87787 |
| DAPI | Thermo Fisher | R37606 |
| ECL kit | Thermo Fisher | 34580 |
| HE staining kit | BOSTER | AR1180 |
| IHC staining kit | BOSTER | SV0004 |
| DAB | BOSTER | AR1027 |
| [Fetal Bovine Serum](https://www.thermofisher.com/cn/zh/home/life-science/cell-culture/mammalian-cell-culture/fbs.html?SID=fr-fbs-main) | Gibco | 10099-141 |
| Trypsin-EDTA (0.25%) | Gibco | 25200072 |
| DMEM/F-12 | Gibco | 11330057 |
| riboFECT CP Transfection Kit  DNA Extraction Kit | Ribo  Qiagen | C10511-1  69504 |
| HiScript III RT SuperMix kit | Vazyme | R323-01 |
| Fast SYBR Green Master Mix | Roche | 04913914001 |

**Supplementary Table 2 Primary antibodies**

| **Reagents** | **Source** | **Identifier** |
| --- | --- | --- |
| Rabbit monoclonal anti-Ubiquitin | CST | 43124 |
| Rabbit monoclonal anti-cGAS | CST | 15102 |
| Rabbit monoclonal anti-STING | CST | 13647 |
| Rabbit monoclonal anti-p-STING | CST | 50907 |
| Rabbit monoclonal anti-P62 | CST | 39749 |
| Rabbit monoclonal anti-p-P62 | CST | 39786 |
| Rabbit monoclonal anti-TBK1 | CST | 3504 |
| Rabbit monoclonal anti-p-TBK1 | CST | 5483 |
| Rabbit monoclonal anti-GPX4 | Abcam | ab125066 |
| Rabbit polyclonal anti-4-HNE  Rabbit monoclonal anti-LC3B  Rabbit monoclonal anti-TOM20  Mouse monoclonal anti-GPX4  Mouse monoclonal anti-dsDNA | Abcam  Abcam  Abcam  Santa  Santa | ab46545  ab192890  ab186735  sc-166570  sc-58749 |
| Mouse monoclonal anti-RPE65 | Santa | sc-390787 |
| Mouse monoclonal anti-PTGS2 | Santa | sc-19999 |
| Mouse monoclonal anti-Rhodopsin | Santa | sc-57432 |
| Mouse monoclonal anti-Arrestin | Santa | sc-166383 |
| Normal mouse IgG | Santa | sc-2025 |
| Mouse monoclonal anti-GRP75 | Santa | sc-133137 |
| Mouse monoclonal anti-VDAC1 | Santa | sc-390996 |
| Mouse monoclonal anti-IP3R1 | Santa | sc-271197 |
| Rabbit polyclonal anti-ZO-1 | Proteintech | 21773-1-AP |
| Mouse monoclonal anti-β-actin | Proteintech | 66009-1-Ig |
| DYKDDDDK tag Polyclonal antibody | Proteintech | 20543-1-AP |
| Goat anti-Mouse IgG (H+L), Alexa Fluor 594 | Thermo Fisher | A11005 |
| Goat anti-Rabbit IgG (H+L), Alexa Fluor 594 | Thermo Fisher | A11012 |
| Goat anti-Mouse IgG (H+L), Alexa Fluor 488 | Thermo Fisher | A11001 |
| Goat anti-Rabbit IgG (H+L), Alexa Fluor 488 | Thermo Fisher | A11008 |
| Goat Anti-Mouse IgG(H+L) | Jackson | 115-035-003 |
| Goat Anti-Rabbit IgG (H+L) | Jackson | 111-035-003 |

**Supplementary Table 3 The sequences of the siRNA and shRNA**

| **Product name** | **Serial number** |
| --- | --- |
| si-GRP75-001 (Human) | GCGATATGATGATCCTGAA |
| si-GRP75-002 (Human) | GAGTCAGATTGGAGCATTT |
| si-GRP75-003 (Human) | GCTGGAATGGCCTTAGTCA |
| si-STING-001(Human) | CUGGCAUGGUCAUAUUACATT |
| si-STING-002 (Human) | GCAUCAAGGAUCGGGUUUATT |
| si-STING-003 (Human) | GGCAUCAAGGAUCGGGUUUTT |
| NC-siRNA (Human) | UUCUCCGAACGUGUCACGUTT |
| GRP75-shRNA (Mouse)  NC-shRNA (Mouse) | GAGGCGTCTTTACCAAACTTA  TTCTCCGAACGTGTCACGT |

**Supplementary Table 4 Primers for Quantitative Real-Time PCR**

| **Primer** | **Sequence** |
| --- | --- |
| Human ND1 Forward | CTCTTCGTCTGATCCGTCCT |
| Human ND1 Reverse | TGAGGTTGCGGTCTGTTAGT |
| Human ND2 Forward | GTAGACAGTCCCACCCTCAC |
| Human ND2 Reverse | TTGATCCCGTTTCGTGCAAG |
| Human ATP6 Forward | AATCCAAGCCTACGTTTTCACA |
| Human ATP6 Reverse | AGTATGAGGAGCGTTATGGAGT |
| Human CO2 Forward | AATCGAGTAGTACTCCCGATTG |
| Human CO2 Reverse | TTCTAGGACGATGGGCATGAAA |
| Human DLOOP Forward | CTATCACCCTATTAACCACTCA |
| Human DLOOP Reverse | TTCGCCTGTAATATTGAACGTA |
| Human 18S Forward | TAGAGGGACAAGTGGCGTTC |
| Human 18S Reverse | CGCTGAGCCAGTCAGTGT |

**
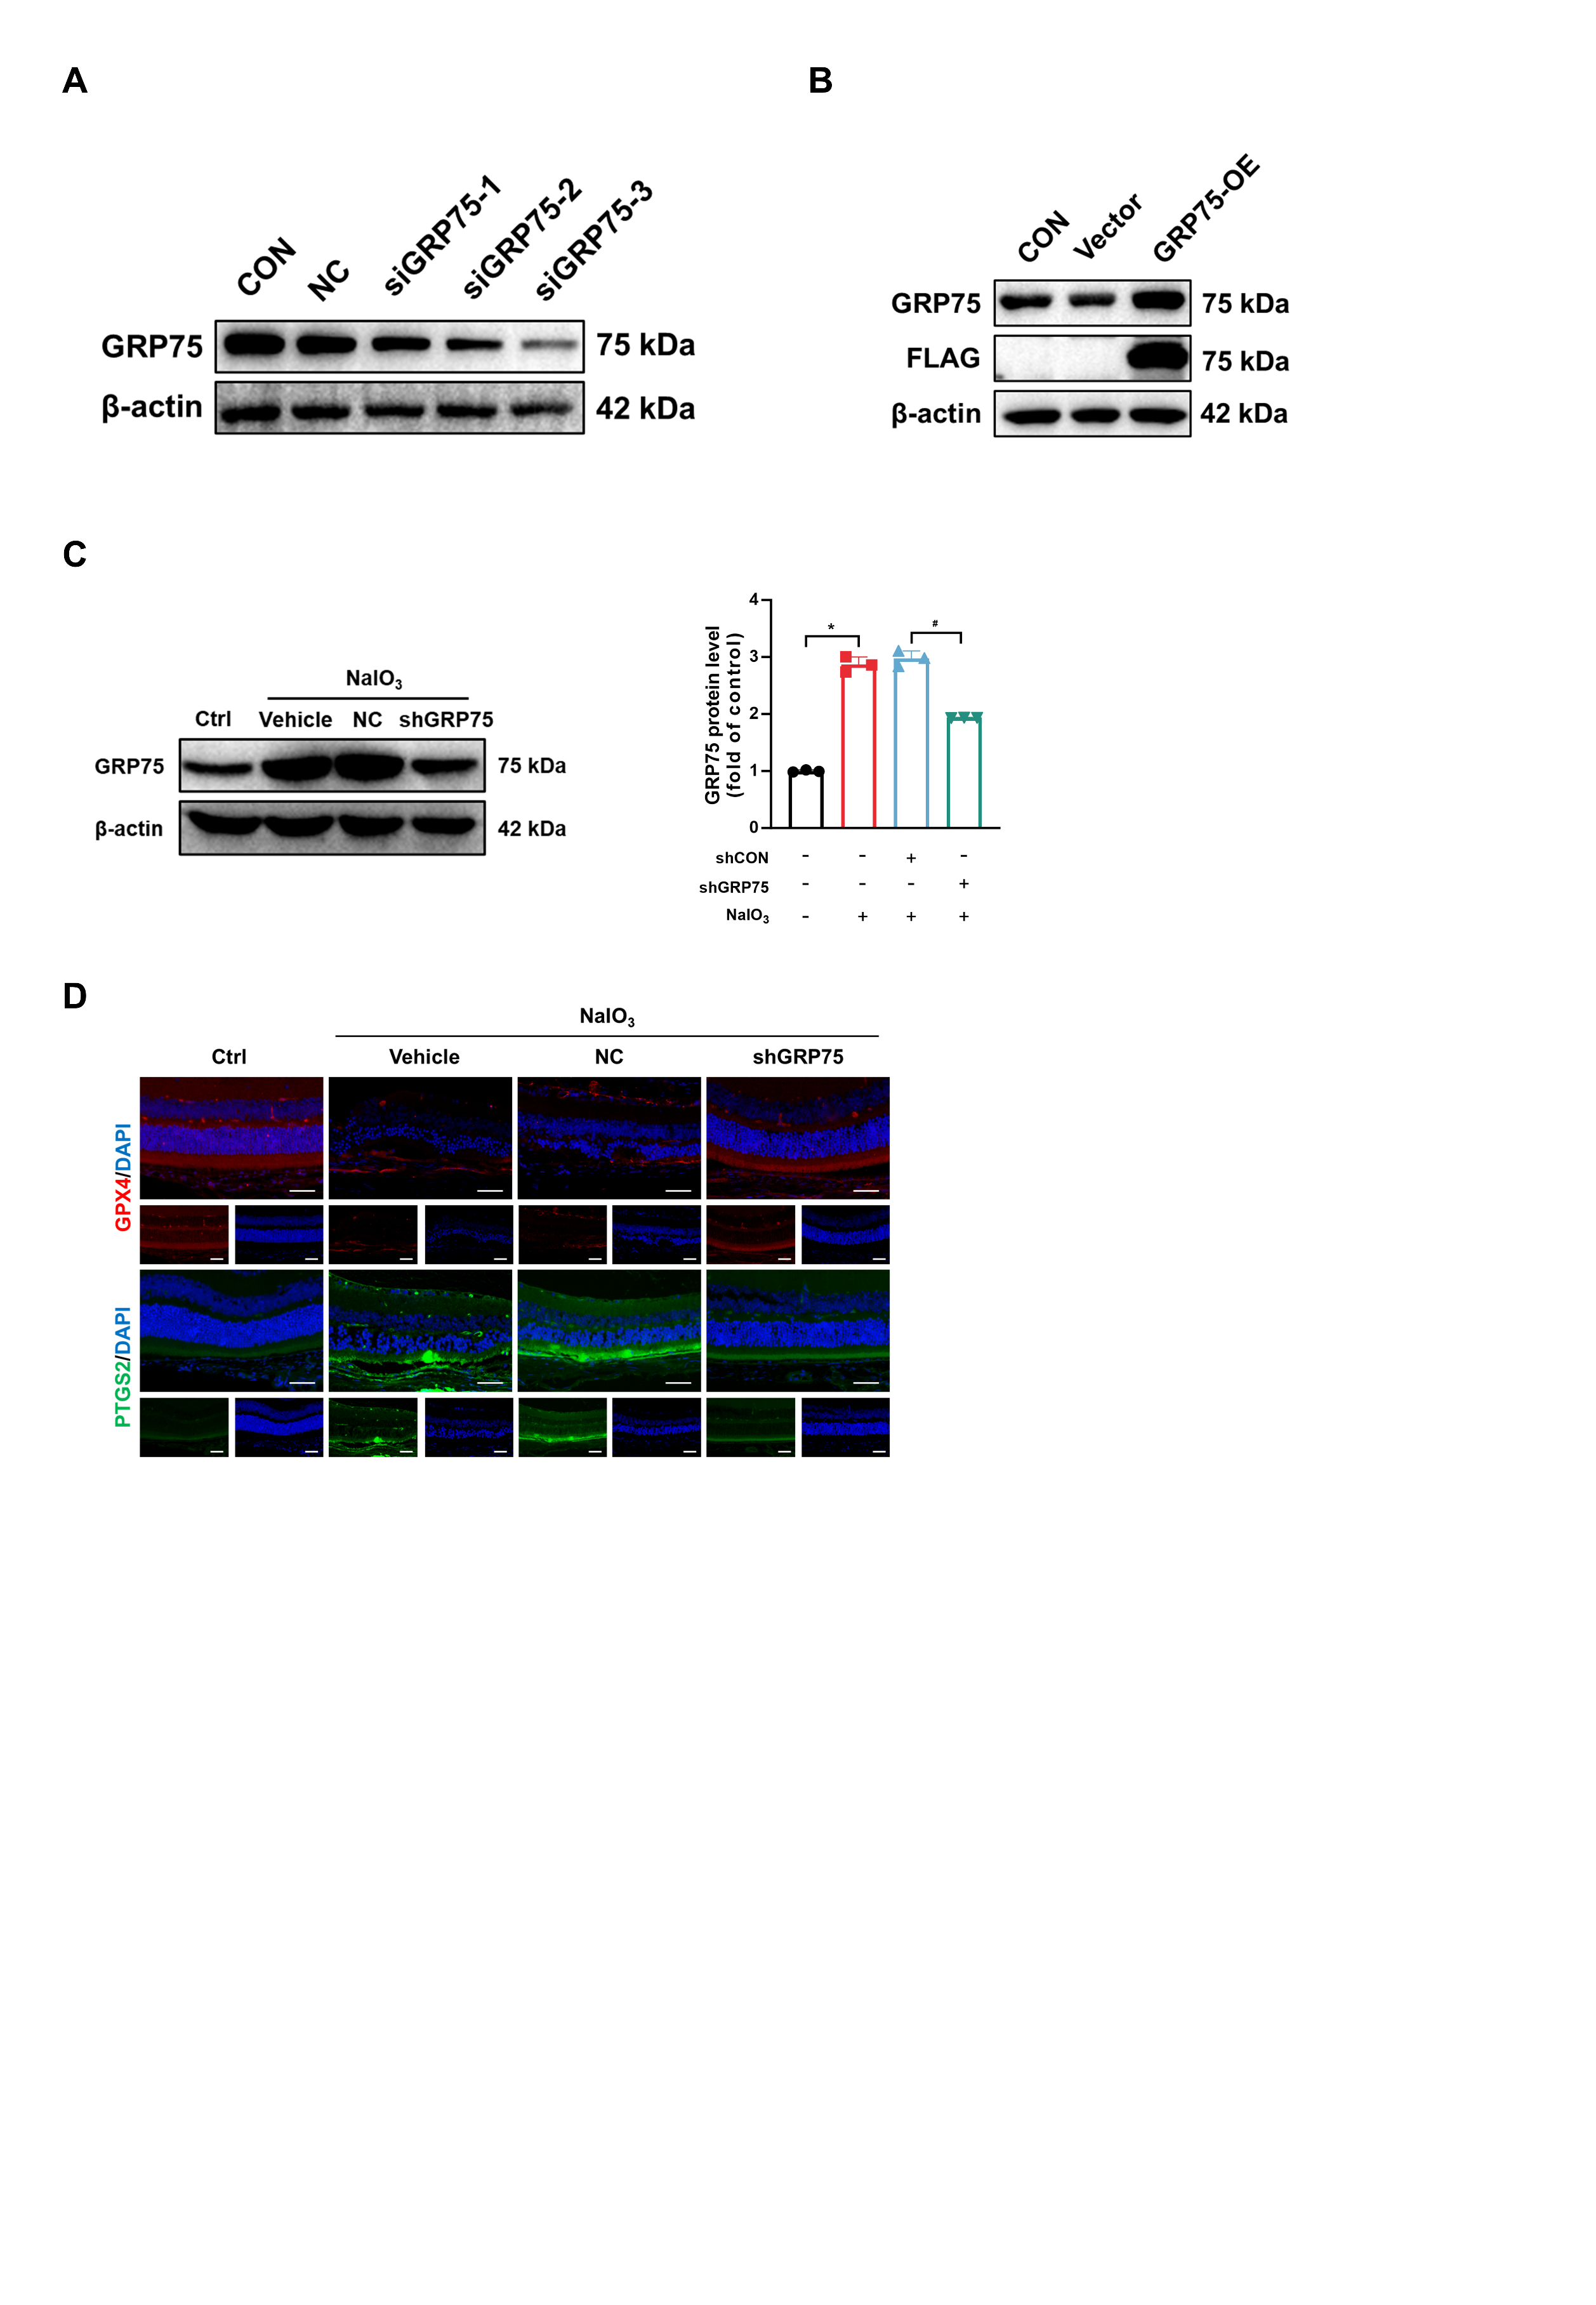
Supplementary Fig. S1 Validation of GRP75 modulation efficiency.** **A** Screening of siRNA sequences for effective GRP75 silencing in ARPE-19 cells, assessed by Western blot analysis (n = 3). **B** Confirmation of GRP75 overexpression following plasmid transfection (n = 3). **C** Verification of GRP75 knockdown in vivo via AAV8-shGRP75 injection (n = 3). **D** Representative immunofluorescence images of PTGS2 and GPX4 in the retinas of mice (n = 3). Scale bars, 50 μm. Data are presented as the mean ± SD. One-way ANOVA was used for statistical analysis. *p < 0.05 versus control group. #p < 0.05 versus NaIO3+NC group.

**
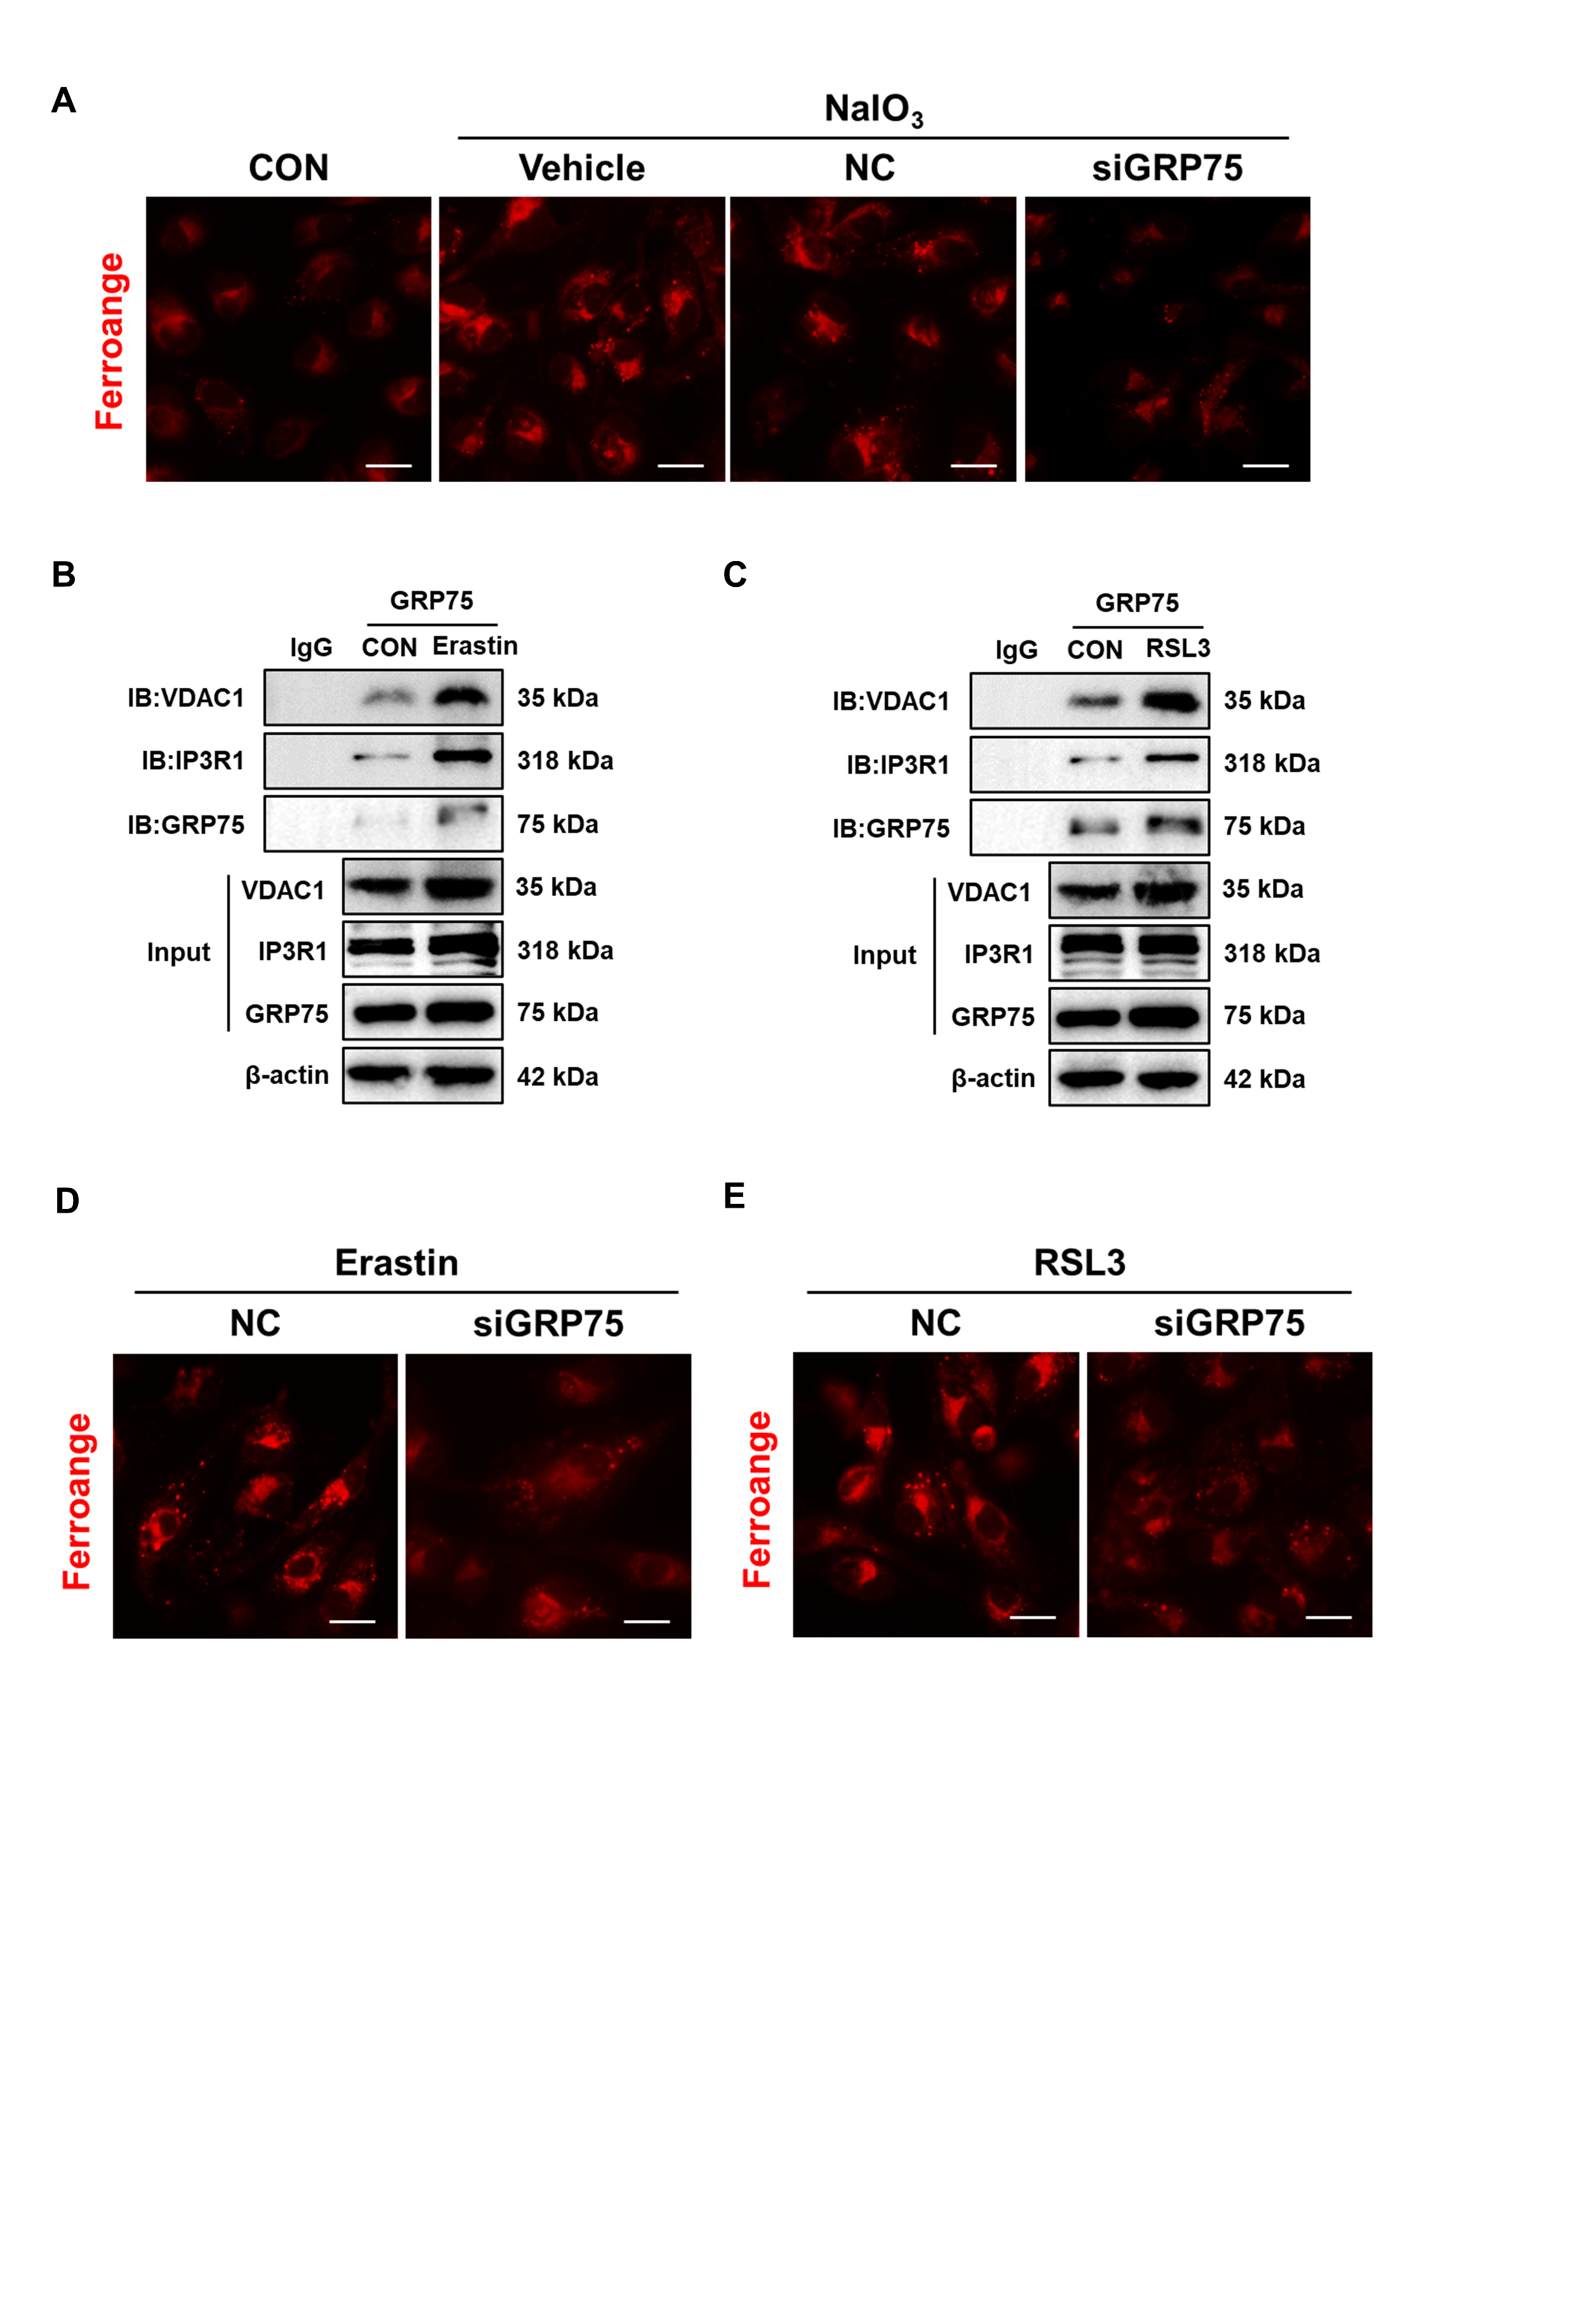
Supplementary Fig. S2 GRP75 knockdown attenuates ferroptosis and ER-mitochondria coupling. A** ARPE-19 cells were stimulated with NaIO3 and transfected with GRP75 siRNA. Quantification of intracellular Fe²⁺ using FerroOrange (1 μM, 30 min) (n = 3). **B-E** ARPE-19 cells were exposed to RSL3 or Erastin, with or without GRP75 siRNA (n = 3). **B, C** Co-immunoprecipitation analysis of GRP75 interactions with IP3R1 or VDAC1 (n = 3). **D, E** Quantification of intracellular Fe²⁺ using FerroOrange (1 μM, 30 min) (n = 3).

**
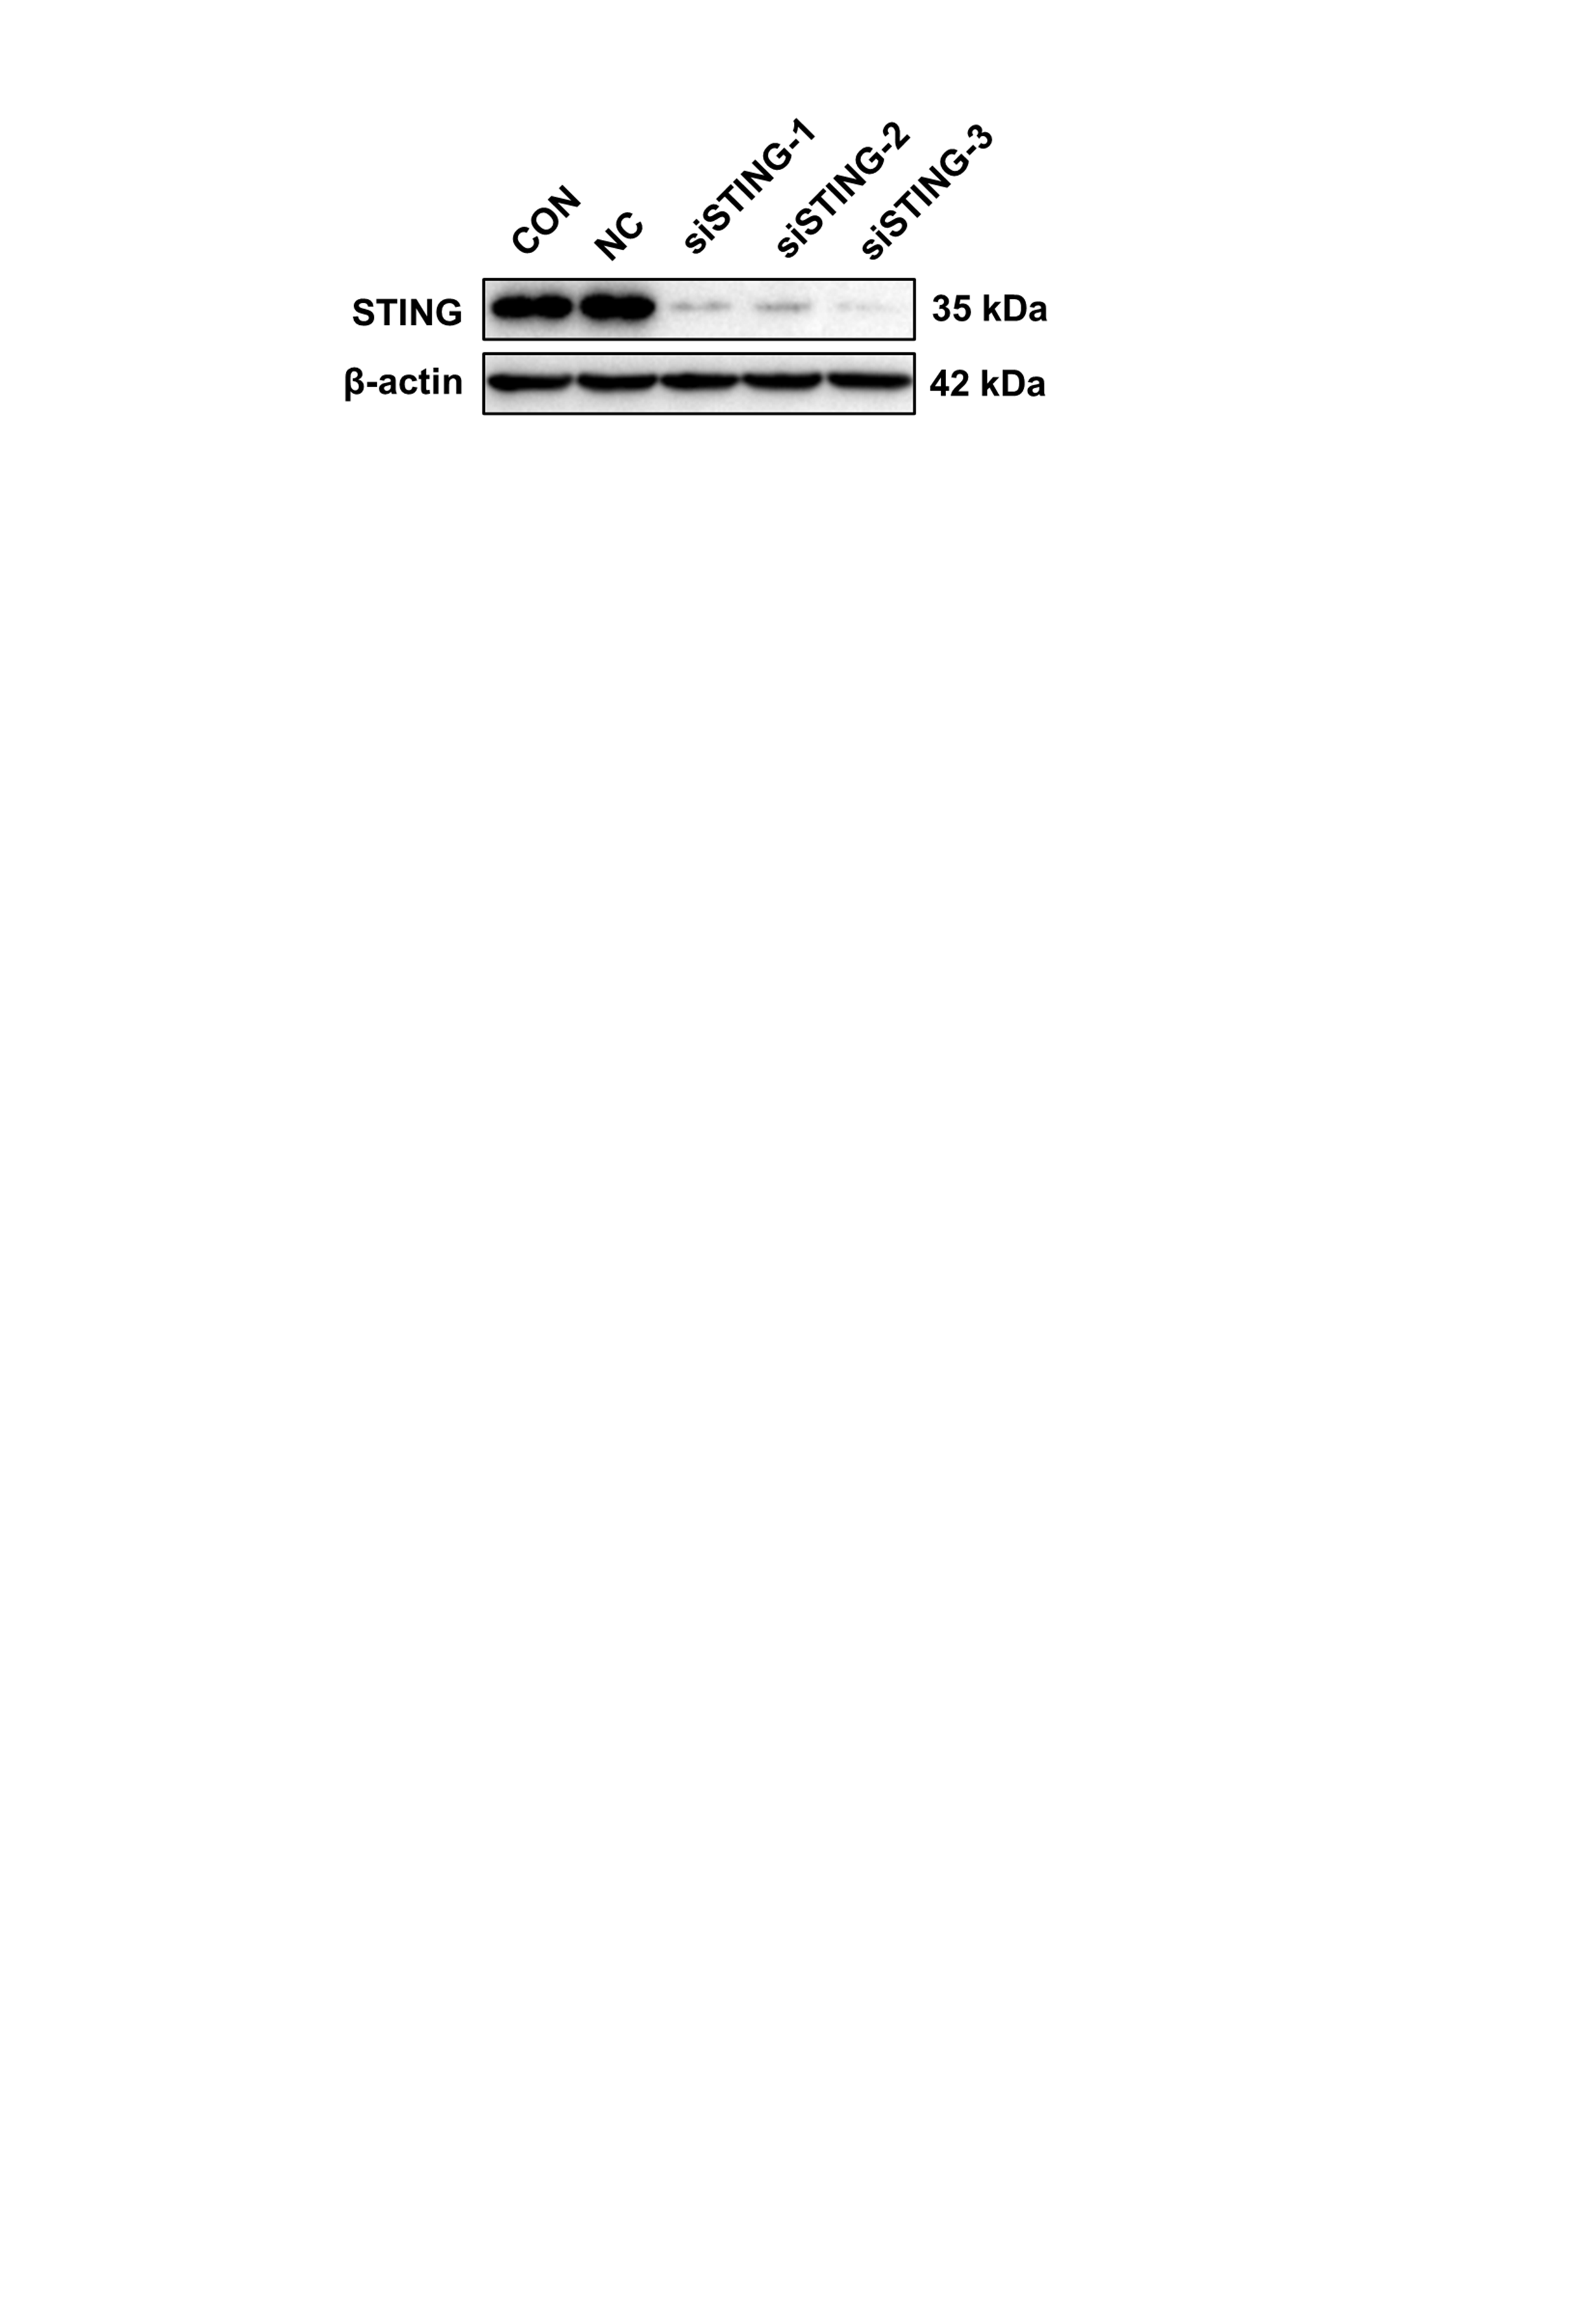
Supplementary Fig. S3 Validation of STING siRNA sequences.** Screening of siRNA sequences for specific knockdown of STING in ARPE-19 cells, confirmed by Western blot (n = 3).

**
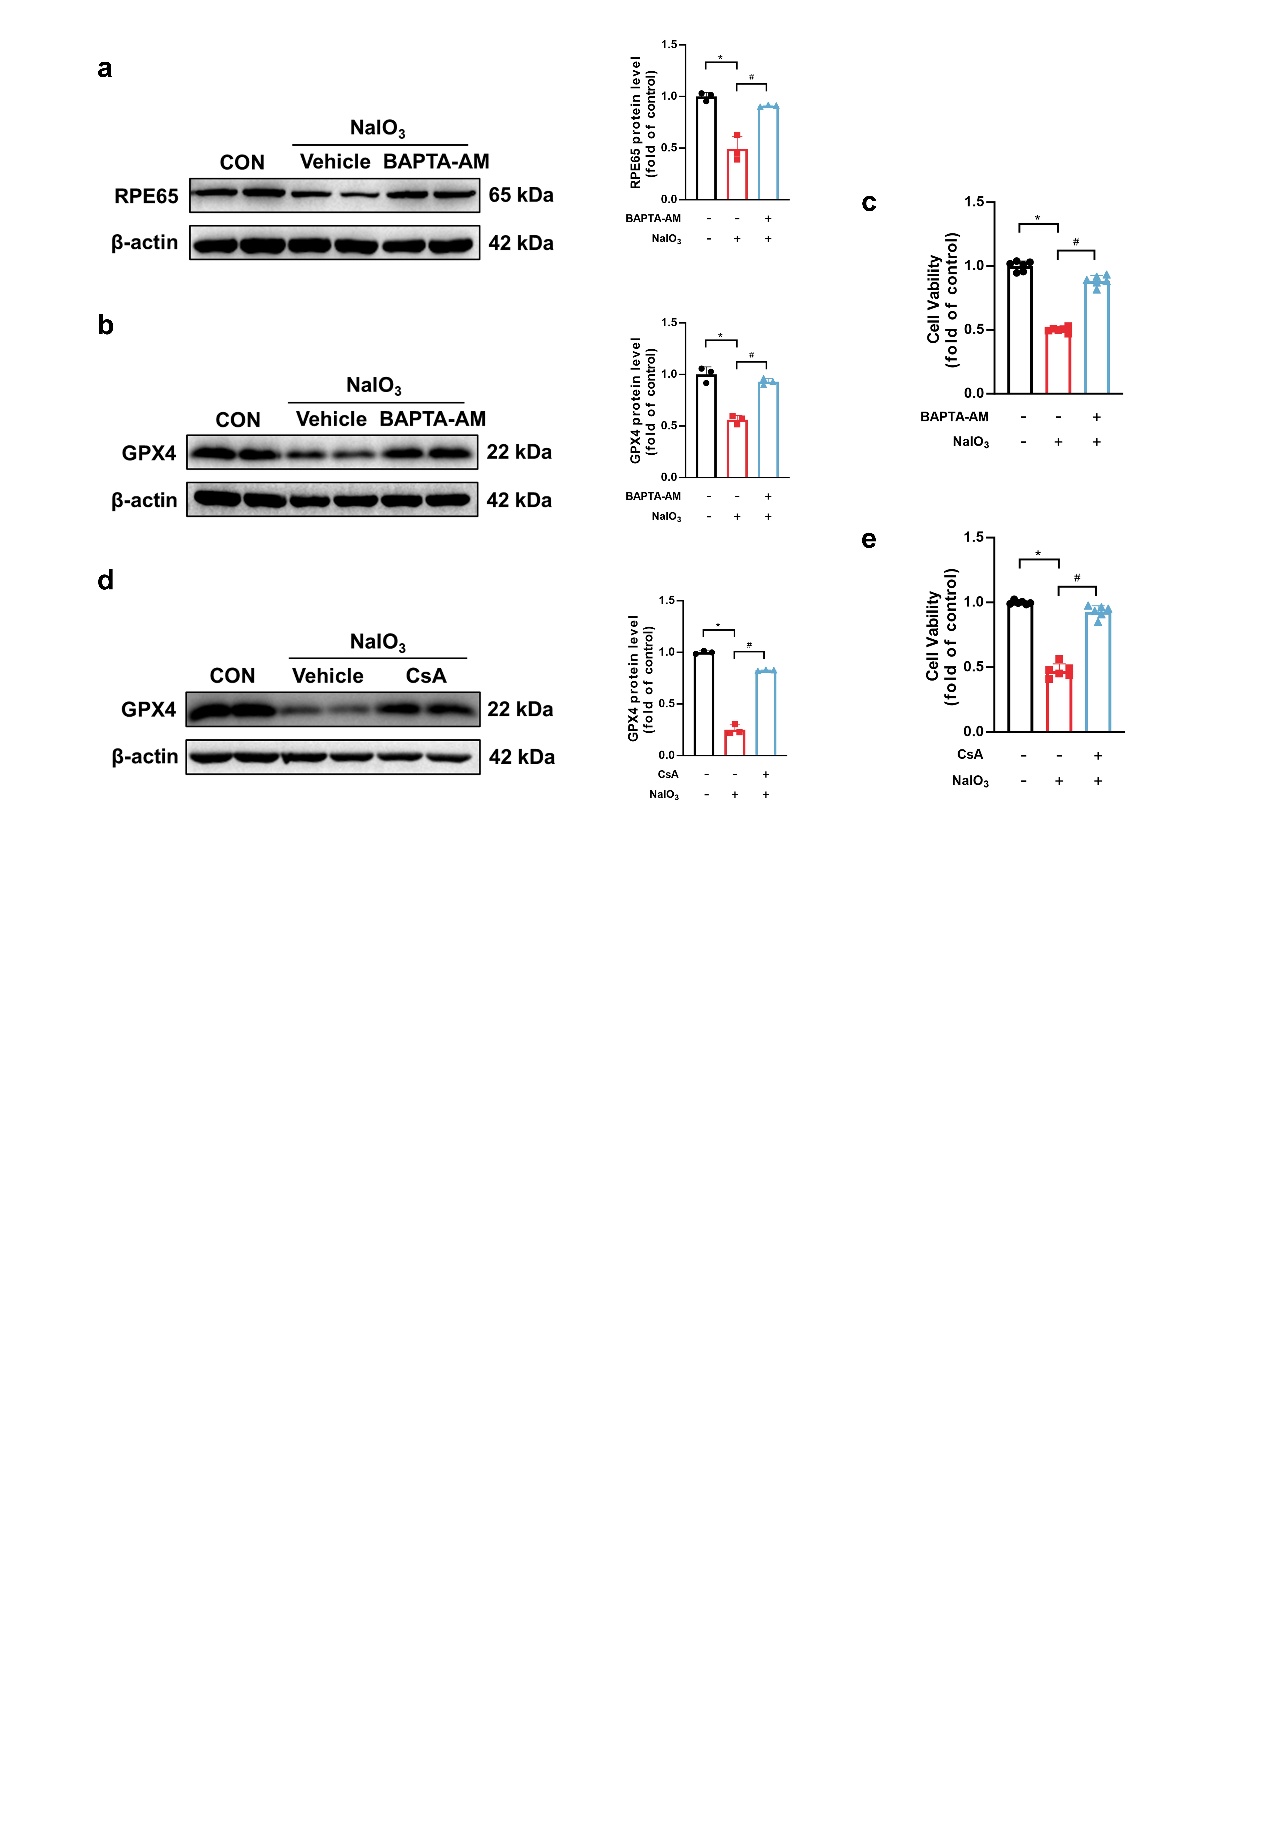
Supplementary Fig. S4 Protective effects of BAPTA-AM and CsA against ferroptosis.** **A-C** ARPE-19 cells were treated with BAPTA-AM (5 μM) under NaIO3 exposure. **A, B** Representative immunoblots of RPE65 and GPX4 proteins in the indicated groups (n = 3). **C** Cell viability assessed by CCK-8 assay in the indicated groups (n = 6). **D, E** ARPE-19 cells were treated with CsA (5 μM) under NaIO3 exposure. **D** Representative immunoblots of GPX4 proteins in the indicated groups (n = 3). **E** Cell viability assessed by CCK-8 assay in the indicated groups (n = 6). Data are presented as the mean ± SD. One-way ANOVA was used for statistical analysis. *p < 0.05 versus control group. #p < 0.05 versus NaIO3+BAPTA-AM or NaIO3+CsA group.
